# Supplementary material for: Three-dimensional embroidered ball-like α-Fe2O3 synthesised by a microwave hydrothermal method as a sulfur immobilizer for high-performance Li–S batteries
Source: Royal Society of Chemistry journal article supplement (doi:10.1039/d1tc05694h), 2022-01-01
Supplement: d1tc05694h1.pdf [file d1tc05694h1.pdf]

## *Supporting Information*

### **3D embroidered ball-like $\alpha$ -Fe<sub>2</sub>O<sub>3</sub> synthesised by microwave hydrothermal as sulfur immobilizer for high performance Li-S batteries**

**Juan Li<sup>a, b</sup>, Youlong Xu<sup>a, b, \*</sup>, Cheng He<sup>c</sup>, Jiping Zhao<sup>a, b</sup>, Yu Liang<sup>c</sup>**

<sup>a</sup>Electronic Materials Research Laboratory, Key Laboratory of the Ministry of Education & International Center for Dielectric Research, School of Electronic Science and Engineering, Xi'an Jiaotong University, Xi'an 710049, China

<sup>b</sup>Shanxi Engineering Research Center of Advanced Energy Materials & Devices, School of Electronic Science and Engineering, Xi'an Jiaotong University, Xi'an 710049, China

<sup>c</sup>State Key Laboratory for Mechanical Behavior of Materials, School of Materials Science and Engineering, Xi'an Jiaotong University, Xi'an 710049, China

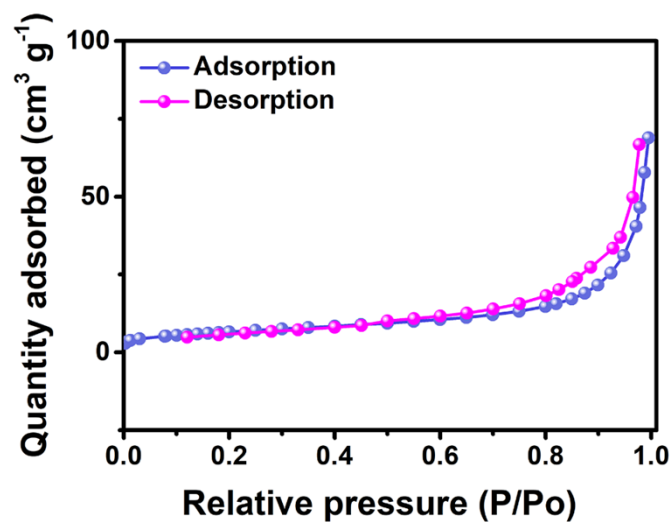

**Fig. S1**The N<sub>2</sub> adsorption isotherm of  $\alpha$ -Fe<sub>2</sub>O<sub>3</sub>/GO-25 composite.

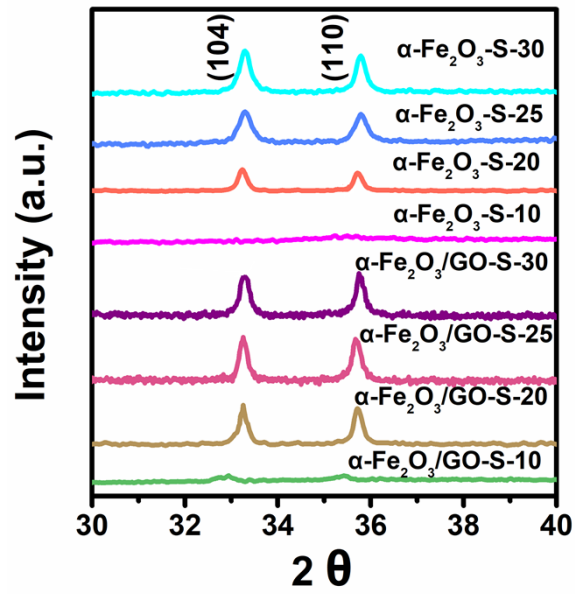

Fig. S2 XRD patterns.

Table S1. Values of different samples.

| Sample                                     | Ratio | Sample                                        | Ratio |
|--------------------------------------------|-------|-----------------------------------------------|-------|
| $\alpha\text{-Fe}_2\text{O}_3\text{-S-20}$ | 0.85  | $\alpha\text{-Fe}_2\text{O}_3/\text{GO-S-20}$ | 1.03  |
| $\alpha\text{-Fe}_2\text{O}_3\text{-S-25}$ | 0.87  | $\alpha\text{-Fe}_2\text{O}_3/\text{GO-S-25}$ | 1.08  |
| $\alpha\text{-Fe}_2\text{O}_3\text{-S-30}$ | 0.88  | $\alpha\text{-Fe}_2\text{O}_3/\text{GO-S-30}$ | 1.09  |

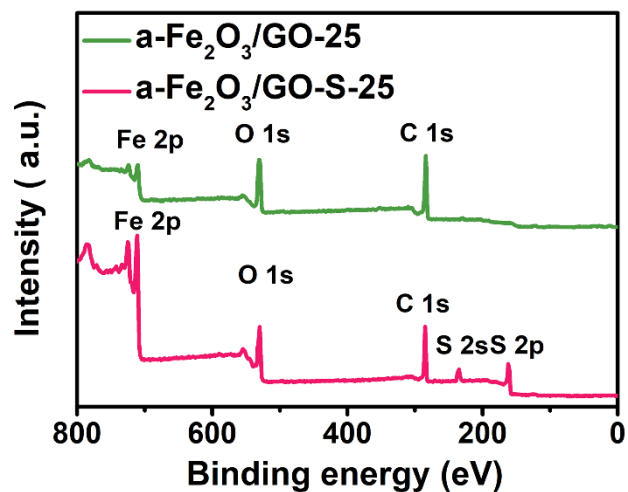

Fig. S3 XPS survey spectra of  $\alpha$ -Fe<sub>2</sub>O<sub>3</sub>/GO-25 and  $\alpha$ -Fe<sub>2</sub>O<sub>3</sub>/GO-S-25 composites.

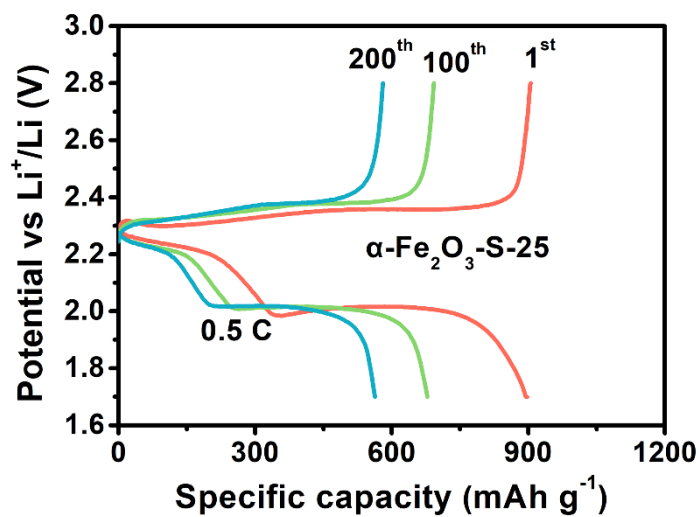

Fig. S4 Galvanostatic charge/discharge profiles of  $\alpha$ -Fe<sub>2</sub>O<sub>3</sub>-S-25 after 200 cycles.

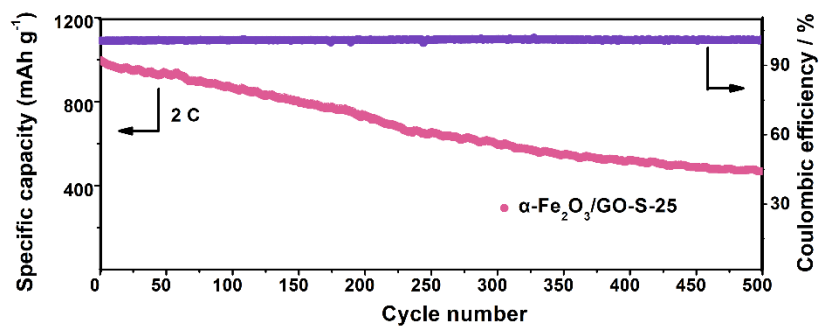

Fig. S5 Cycling performance of  $\alpha\text{-Fe}_2\text{O}_3/\text{GO-S-25}$  electrode at 2 C after 500 cycles.

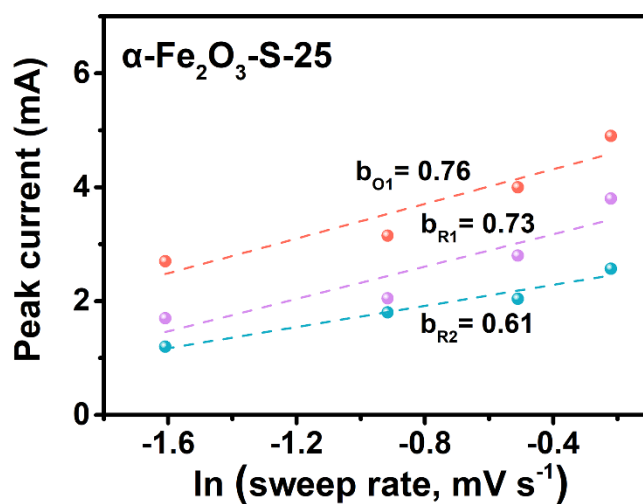

Fig. S6 The correspond fitted lines of  $\alpha\text{-Fe}_2\text{O}_3\text{-S-25}$  electrodes at different scan rate.

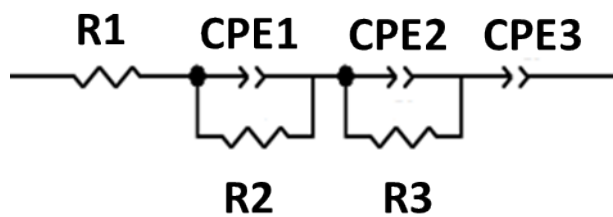

Fig. S7 The equivalent circuit diagram of  $\alpha\text{-Fe}_2\text{O}_3/\text{GO-S-25}$  electrode.

Table S2. Rct ( $\Omega$ ) values of different electrodes.

| Sample                                         | Rct ( $\Omega$ ) | Sample                                            | Rct ( $\Omega$ ) |
|------------------------------------------------|------------------|---------------------------------------------------|------------------|
| $\alpha$ -Fe <sub>2</sub> O <sub>3</sub> -S-10 | 87.5             | $\alpha$ -Fe <sub>2</sub> O <sub>3</sub> /GO-S-10 | 58.3             |
| $\alpha$ -Fe <sub>2</sub> O <sub>3</sub> -S-20 | 79.0             | $\alpha$ -Fe <sub>2</sub> O <sub>3</sub> /GO-S-20 | 42.8             |
| $\alpha$ -Fe <sub>2</sub> O <sub>3</sub> -S-25 | 63.1             | $\alpha$ -Fe <sub>2</sub> O <sub>3</sub> /GO-S-25 | 17.2             |
| $\alpha$ -Fe <sub>2</sub> O <sub>3</sub> -S-30 | 66.2             | $\alpha$ -Fe <sub>2</sub> O <sub>3</sub> /GO-S-30 | 21.9             |

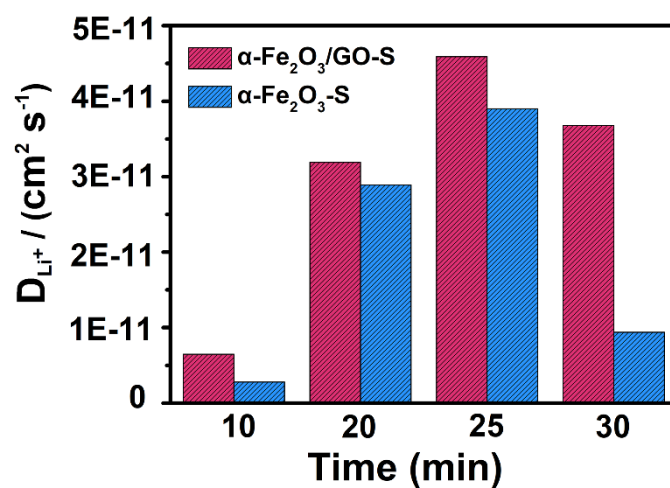

Fig. S8 The calculated  $D_{Li^+}$  values obtained from EIS tests for  $\alpha$ -Fe<sub>2</sub>O<sub>3</sub>-S and  $\alpha$ -Fe<sub>2</sub>O<sub>3</sub>/GO-S electrodes.
